# Supplementary material for: Fabrication of photostable PEGylated polymer nanoparticles from AIE monomer and trimethylolpropane triacrylate
Source: Royal Society of Chemistry journal article supplement (doi:10.1039/c5ra16258k), 2015-01-01
Supplement: c5ra16258k1.pdf [file c5ra16258k1.pdf]

## Supporting Information

# Fabrication of photostable PEGylated polymer nanoparticles from AIE monomer and trimethylolpropane triacrylate

Ke Wang,<sup>a</sup> Xiaoyong Zhang,<sup>\*a,b</sup> Xiqi Zhang,<sup>a,c</sup> Xingliang Fan,<sup>a</sup> Zhen Li,<sup>a</sup> Zengfang Huang,<sup>a</sup>  
Qingsong Zhang,<sup>a</sup> Yen Wei<sup>\*a</sup>

<sup>a</sup> Department of Chemistry and Key Laboratory of Bioorganic Phosphorus Chemistry & Chemical Biology (Ministry of Education), Tsinghua University, Beijing, 100084, China.

<sup>b</sup> Department of Chemistry/Institute of Polymers, Nanchang University, 999 Xuefu Avenue, Nanchang, 330031, China

<sup>c</sup> Laboratory of Bio-Inspired Smart Interface Science, Technical Institute of Physics and Chemistry, Chinese Academy of Sciences, Beijing, 100190, China

\* E-mail: weiyen@tsinghua.edu.cn, wangke007@iccas.ac.cn, xiaoyongzhang1980@gmail.com

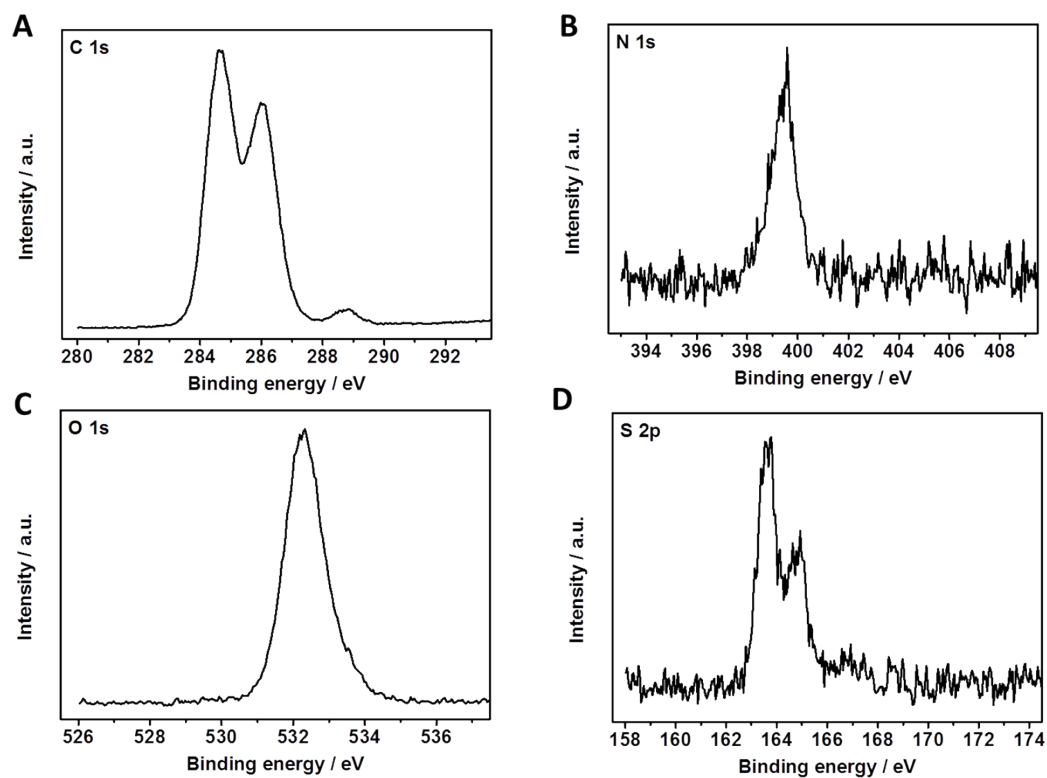

**Fig. S1** XPS spectra of PhE-TT-PEG FPNs: (A) C 1s spectrum; (B) N 1s spectrum; (C) O 1s spectrum; (D) S 2p spectrum.

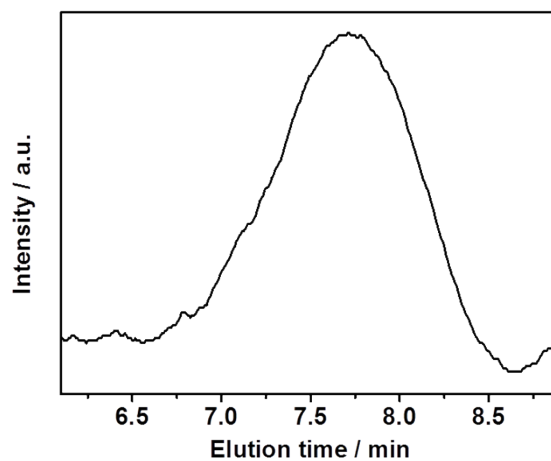

**Fig. S2** GPC chart of PhE-TT-PEG (eluent: DMF).

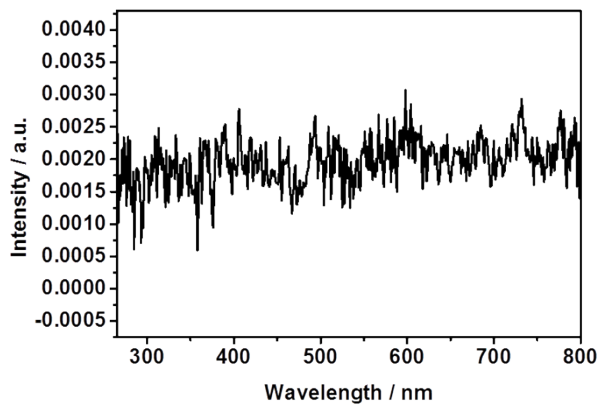

**Figure S3** The absorption spectra of the filtrate after dialysis of PhE-TT-PEG against PBS solution and THF.

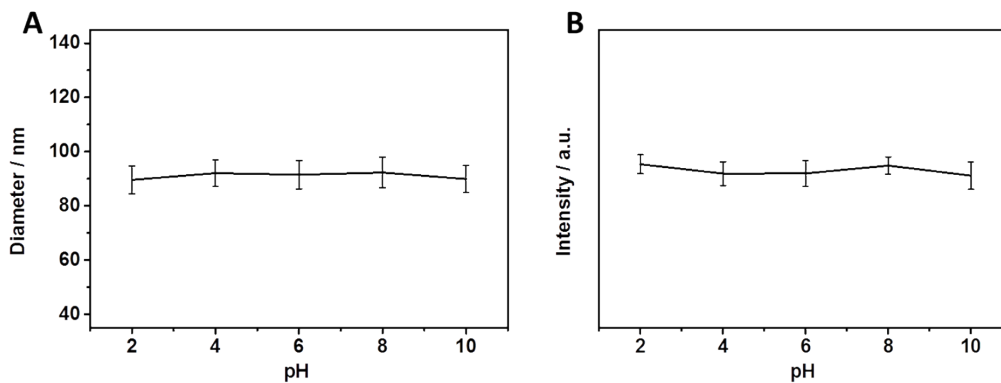

**Fig. S4** (A) Hydrodynamic size changes of PhE-TT-PEG FPNs in PBS of different pH values; (B) Fluorescence intensity changes of PhE-TT-PEG FPNs in PBS of different pH values ( $\lambda_{ex} = 488$  nm and  $\lambda_{em} = 580$  nm).

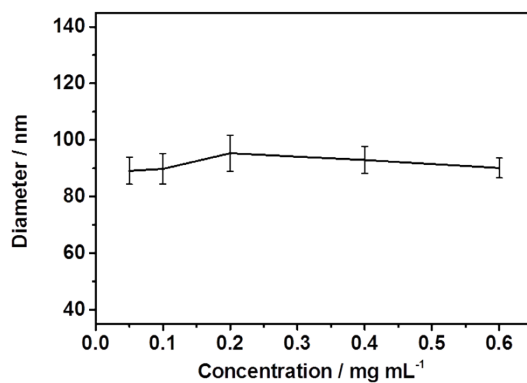

**Fig. S5** Hydrodynamic size changes of PhE-TT-PEG FPNs in PBS with different concentrations.

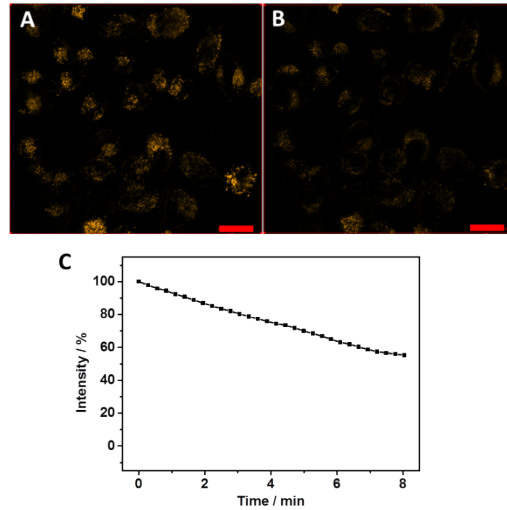

**Fig. S6** Photostability of PhE-TT-PEG FPNs in live HeLa cells under continuous and strong lasers canning of 458 nm. Confocal images of PhE-TT-PEG FPNs stained cells: (A) before and (B) after the laser irradiation for 8 min. Scale bar = 20  $\mu$ m. (C) The fluorescence intensity change during the photobleaching.

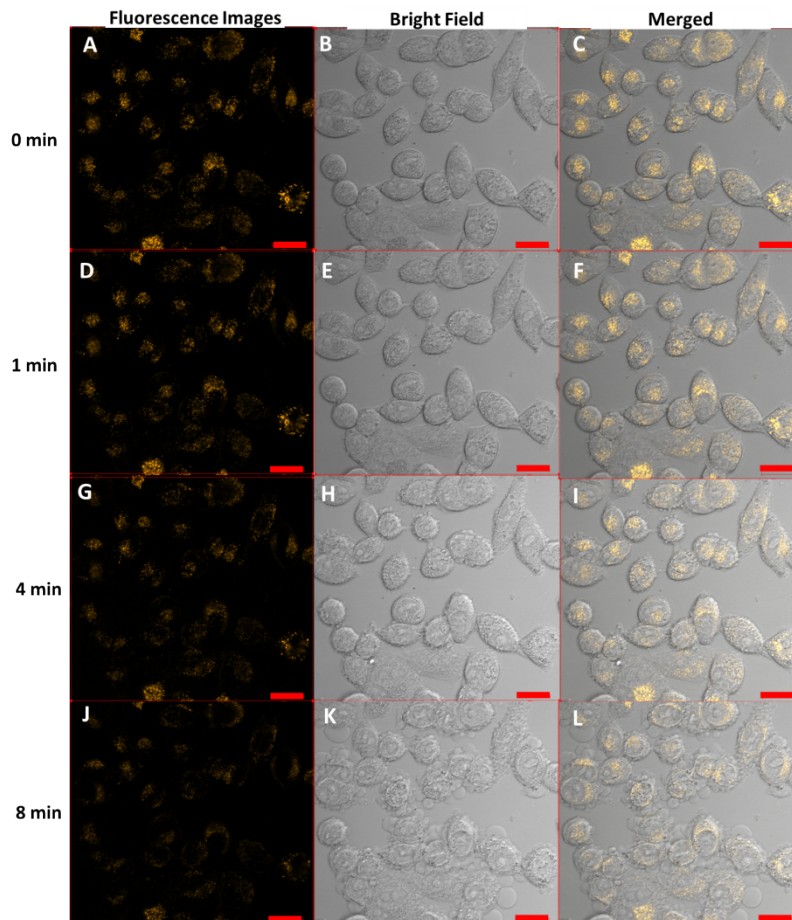

**Fig. S7** CLSM images of live HeLa cells after photobleaching of different time. (A, D, G, J) fluorescent images under the excitation wavelength of 458 nm; (B, E, H, K) differential interference contrast images; (C, F, I, L) the corresponding overlay images. Scale bar = 20  $\mu$ m.
